# Supplementary material for: Improving the optoelectronic properties of single-crystalline antimony sulfide rods through simultaneous defect suppression and surface cleaning
Source: Royal Society of Chemistry journal article supplement (doi:10.1039/d3ta00954h), 2023-01-01
Supplement: d3ta00954h2.pdf [file d3ta00954h2.pdf]

# Supporting Information

## Improving the Optoelectronic Properties of Single-Crystal Antimony Sulfide Rods through Simultaneous Defect Suppression and Surface Cleaning

Xiaohui Liu <sup>a</sup>, Shunhong Dong <sup>a</sup>, Xiaolu Zheng <sup>a</sup>, Yicheng Zhang <sup>b</sup>, Yuan Yao <sup>c</sup>, Weibin Zhang <sup>a</sup>, Zhiyong Liu <sup>a</sup>, Ting Zhu <sup>a</sup>, Hong-En Wang <sup>a,\*</sup>

<sup>a</sup> College of Physics and Electronic Information, Yunnan Key Laboratory of Optoelectronic Information Technology, Key Laboratory of Advanced Technique & Preparation for Renewable Energy Materials, Ministry of Education, Yunnan Normal University, Kunming 650500, China.

<sup>b</sup> College of Chemistry and Chemical Engineering, Yunnan Normal University, 650500 Kunming, China.

<sup>c</sup> Beijing National Laboratory of Condensed Matter Physics, Institute of Physics, Chinese Academy of Sciences, Beijing 100190, China.

\* Correspondence: [hongen.wang@outlook.com](mailto:hongen.wang@outlook.com); [hongen.wang@ynnu.edu.cn](mailto:hongen.wang@ynnu.edu.cn)

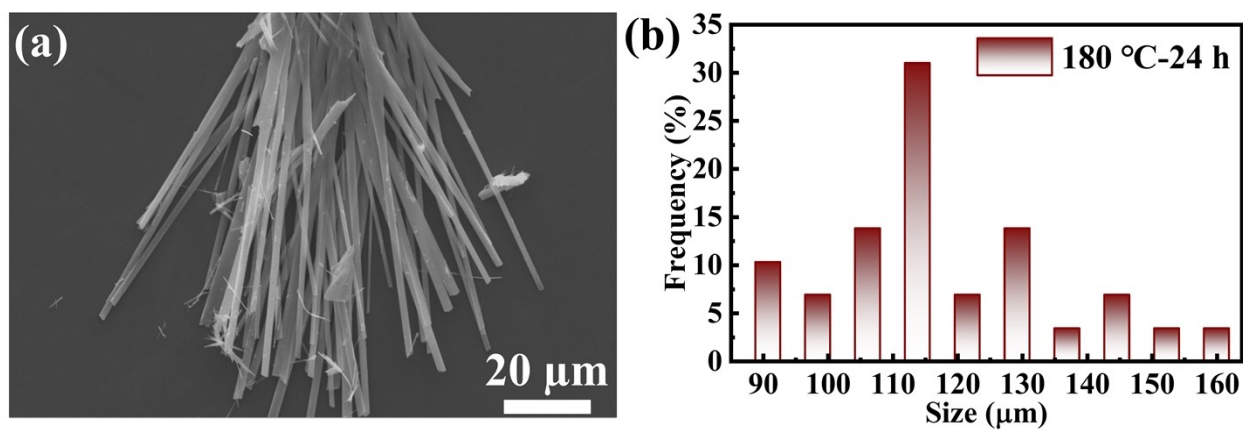

**Figure S1.** A representative low-magnification SEM image of pristine  $\text{Sb}_2\text{S}_3$  (p- $\text{Sb}_2\text{S}_3$ ) rods obtained by hydrothermal reaction at 180 °C for 24 h.

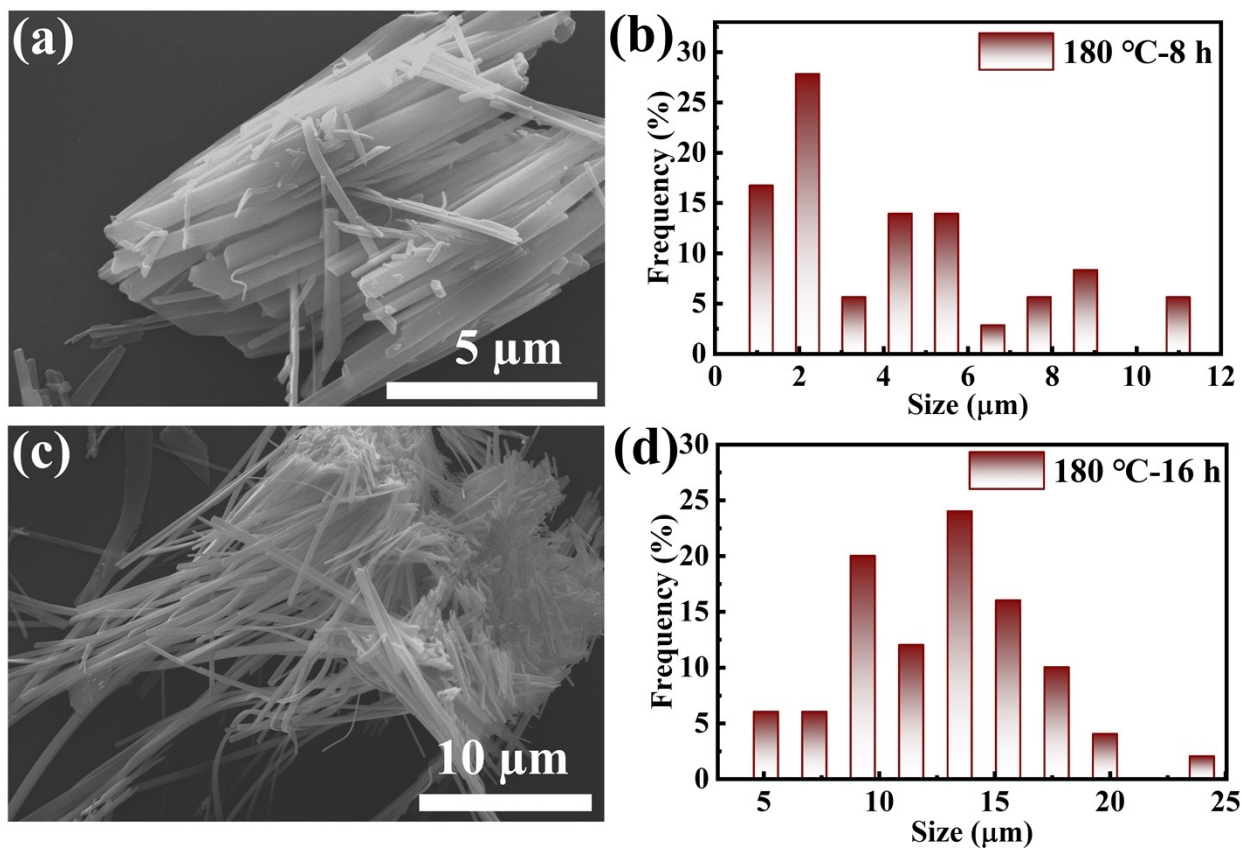

**Figure S2.** (a, c) SEM images and (b, d) corresponding size distribution histograms of the  $\text{Sb}_2\text{S}_3$  rods prepared by hydrothermal reactions at 180 °C for (a, b) 8 h and (c, d) 16 h, respectively.

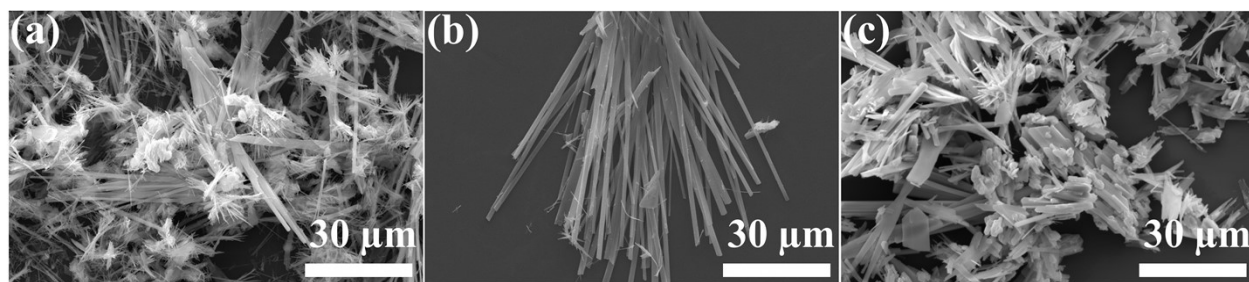

**Figure S3.** SEM images of the  $\text{Sb}_2\text{S}_3$  rods hydrothermally synthesized at (a) 160 °C, (b) 180 °C, and (c) 200 °C for 24 h, respectively.

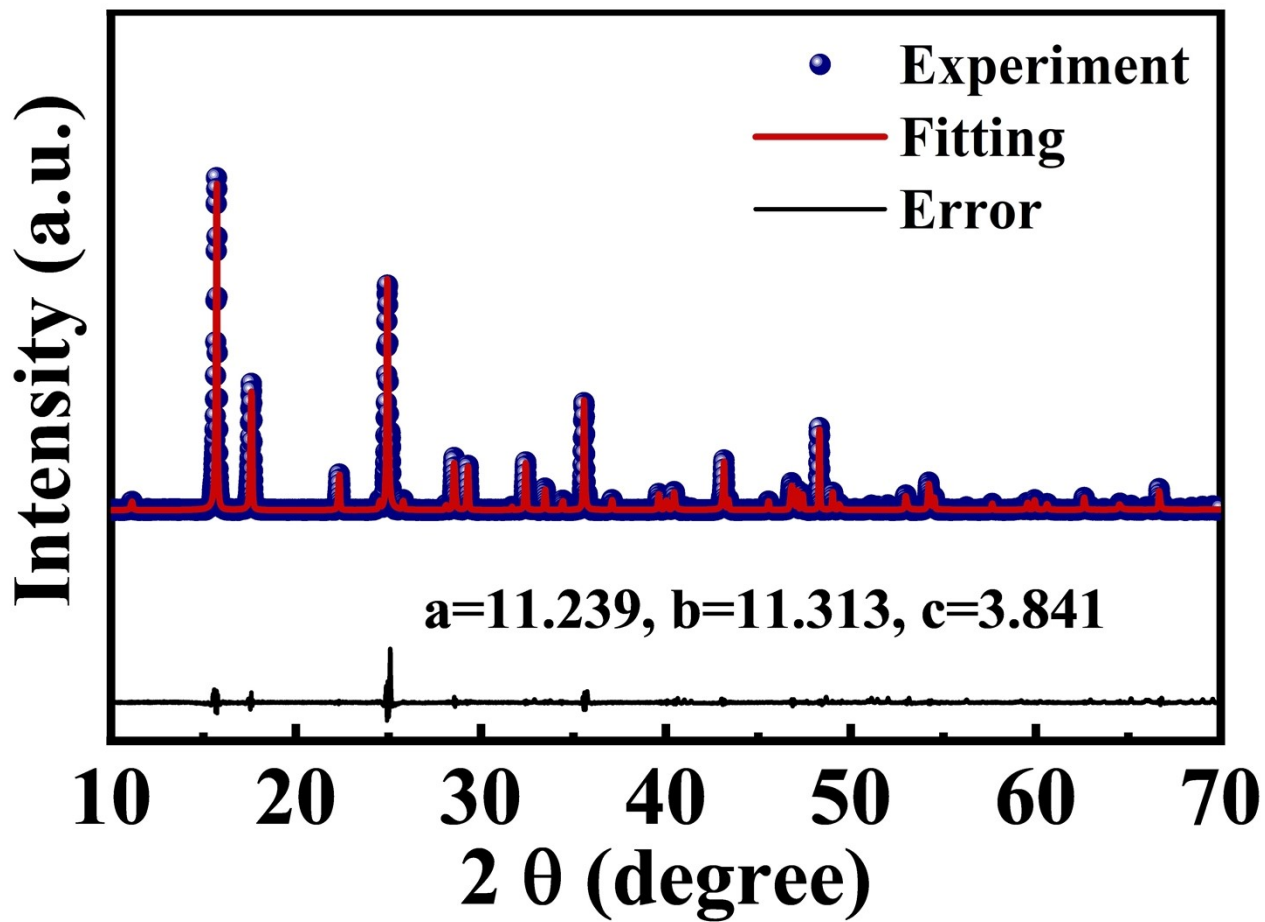

Figure S4. Rietveld refinement analysis for the XRD pattern of the  $\text{Sb}_2\text{S}_3\text{-H}_2/\text{Ar}$  sample.

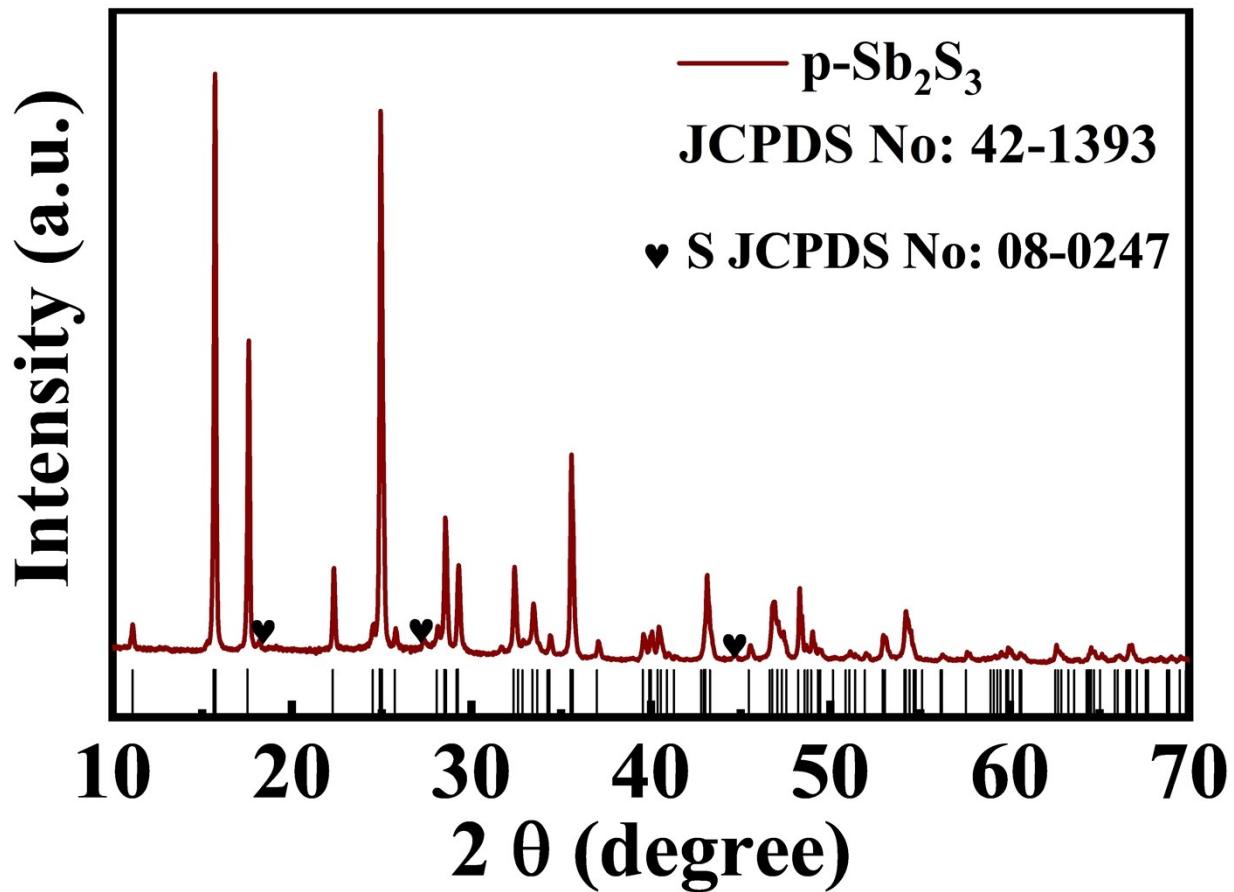

**Figure S5.** XRD pattern of the hydrothermally prepared pristine Sb<sub>2</sub>S<sub>3</sub> rods (p-Sb<sub>2</sub>S<sub>3</sub>) containing trace sulfur impurity.

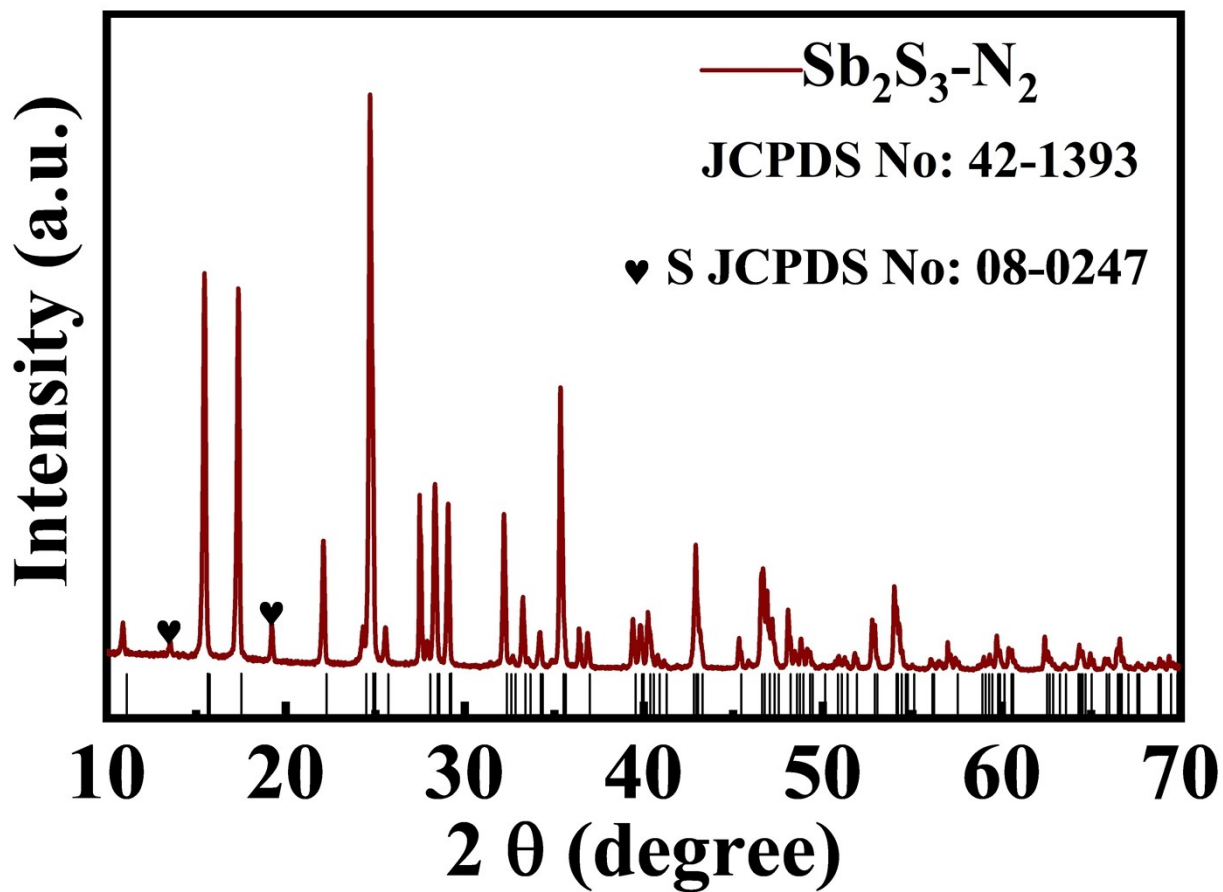

**Figure S6.** XRD pattern of the hydrothermally prepared pristine  $\text{Sb}_2\text{S}_3$  rods followed by annealing in nitrogen ( $\text{Sb}_2\text{S}_3\text{-N}_2$ ) containing residual sulfur impurity.

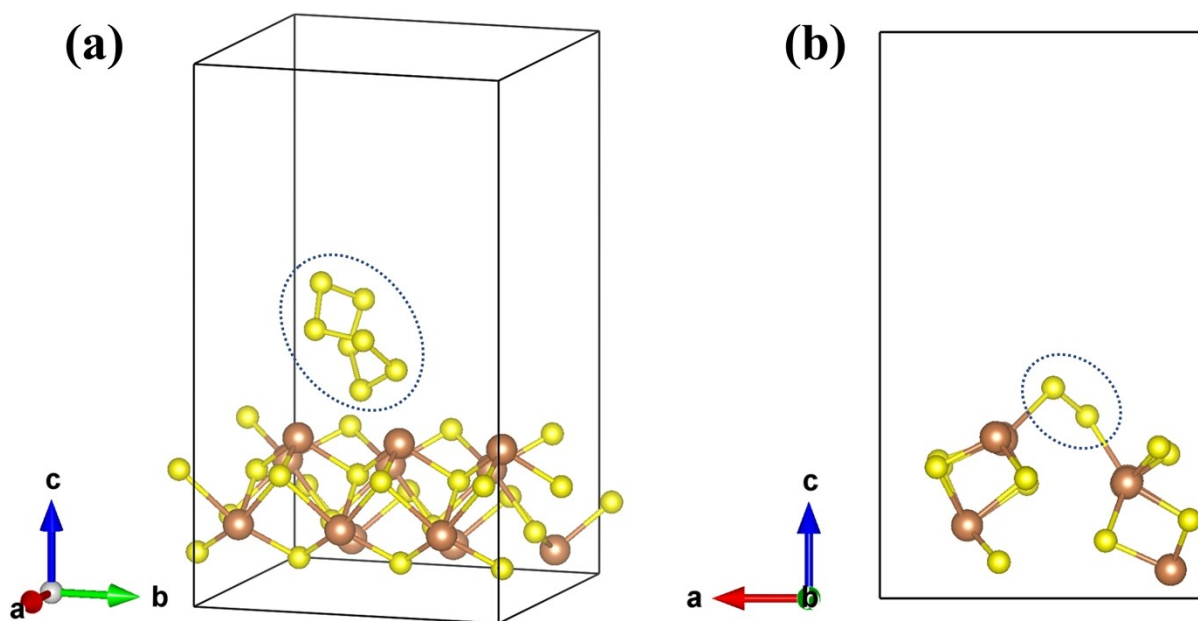

**Figure S7.** Adsorption configurations of one (a)  $\text{S}_8$  and (b)  $\text{S}_2$  molecule on  $\text{Sb}_2\text{S}_3$  (010) surface after geometry optimization, leading to an adsorption energy of -0.69 and -1.22 eV, respectively. The  $\text{S}_8$  (left) and  $\text{S}_2$  (right) molecules have been marked by dotted ellipses for clarity.



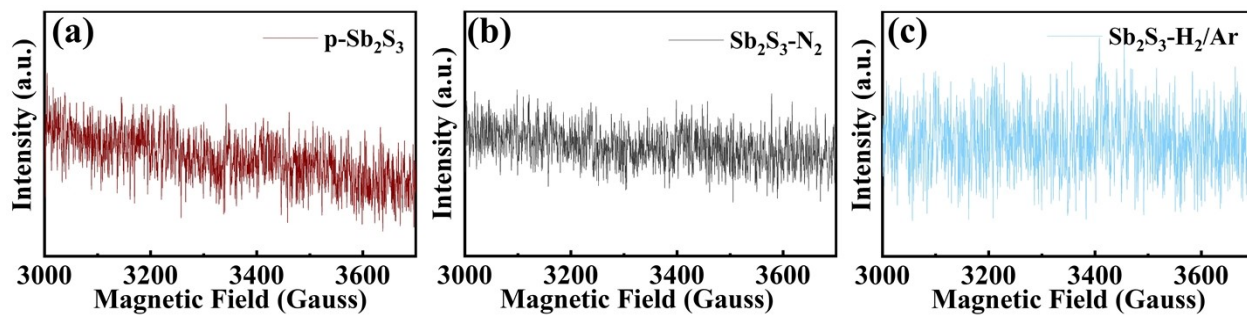

**Figure S8.** EPR spectra of the (a) p-Sb<sub>2</sub>S<sub>3</sub>, (b) Sb<sub>2</sub>S<sub>3</sub>-N<sub>2</sub>, and (c) Sb<sub>2</sub>S<sub>3</sub>-H<sub>2</sub>/Ar samples.

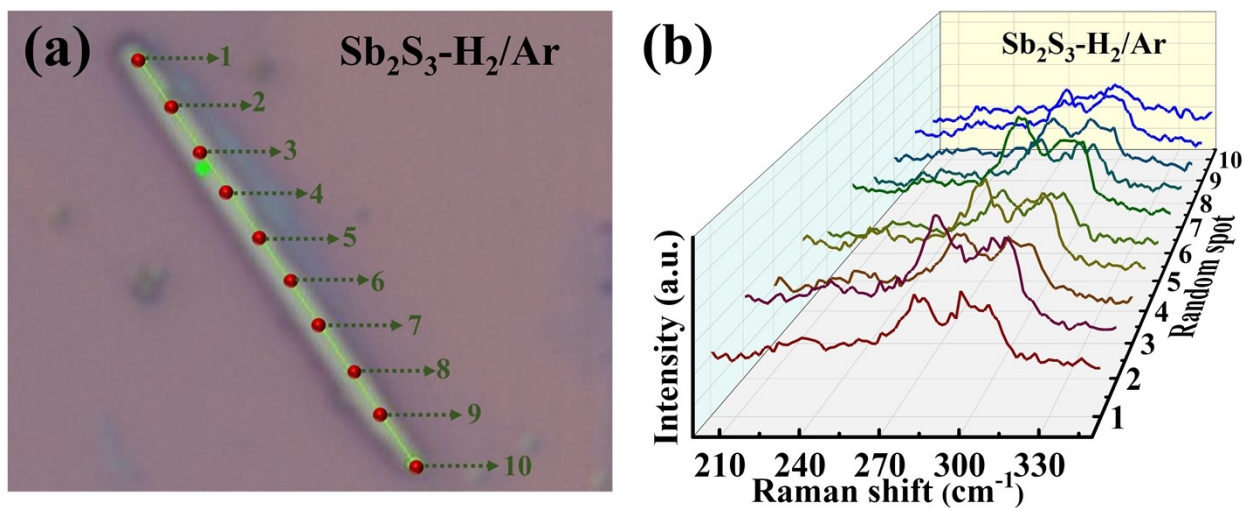

**Figure S9.** Linear sweep Raman spectra of (b, right) a single  $\text{Sb}_2\text{S}_3\text{-H}_2/\text{Ar}$  rod at several different positions (a, left).

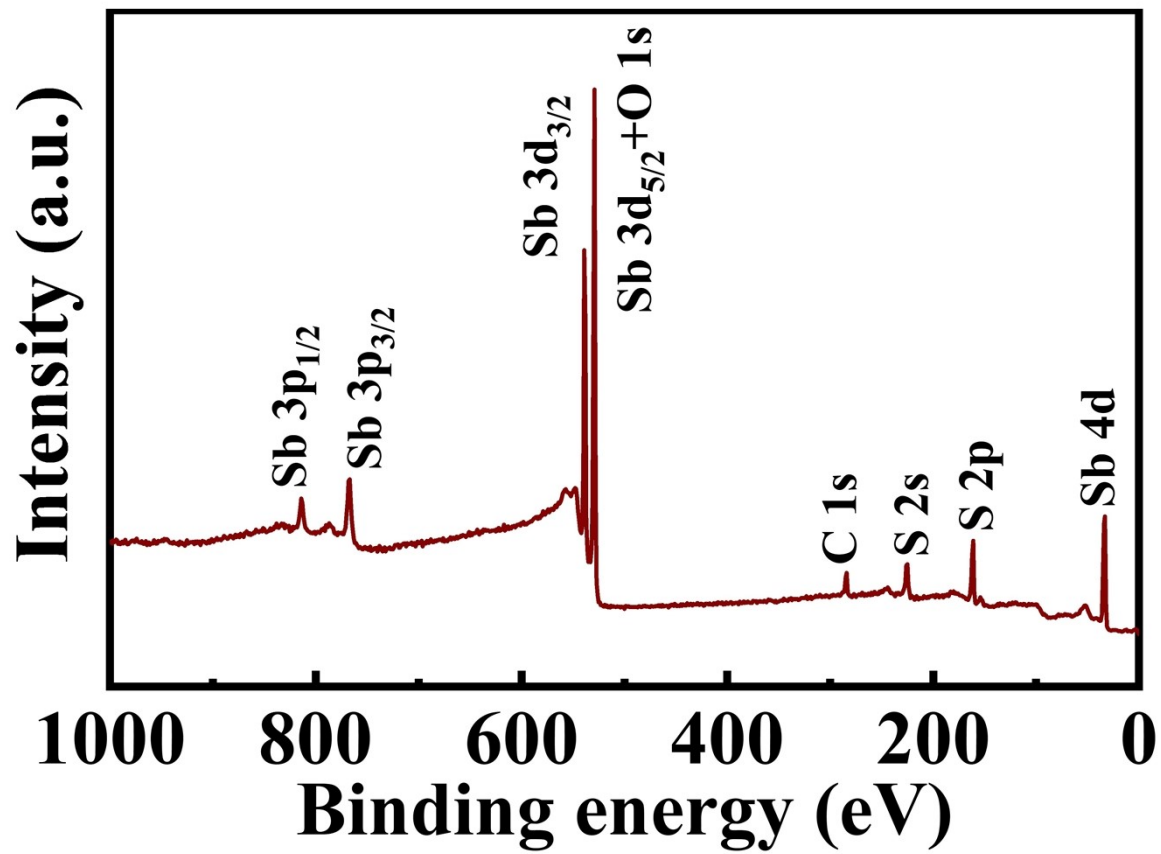

Figure S10. Survey XPS spectrum of the Sb<sub>2</sub>S<sub>3</sub>-H<sub>2</sub>/Ar sample.

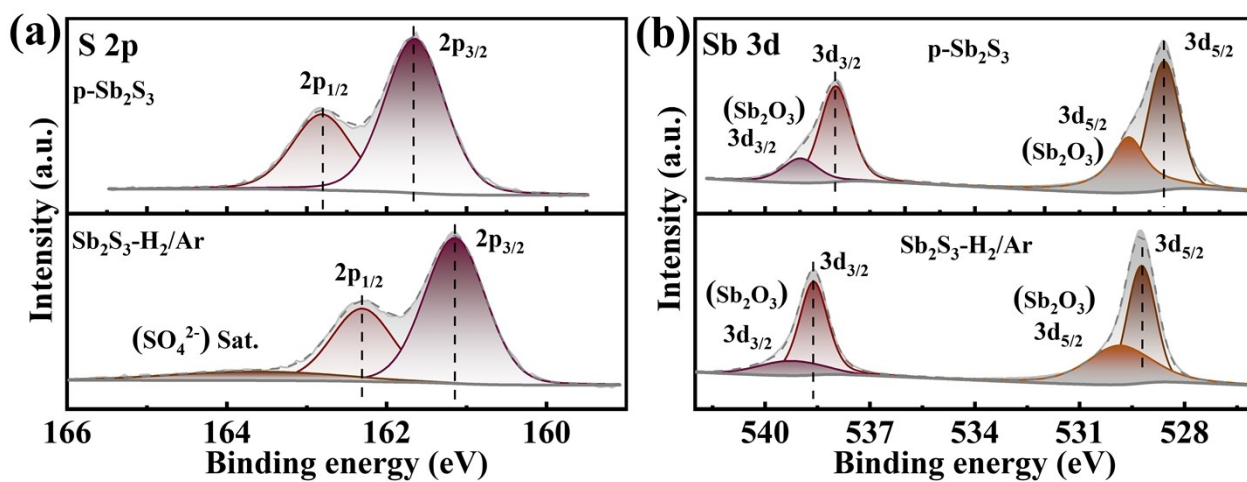

**Figure S11.** High-resolution XPS spectra of (a) S 2*p* and (b) Sb 3*d* of p-Sb<sub>2</sub>S<sub>3</sub> and Sb<sub>2</sub>S<sub>3</sub>-H<sub>2</sub>/Ar samples.

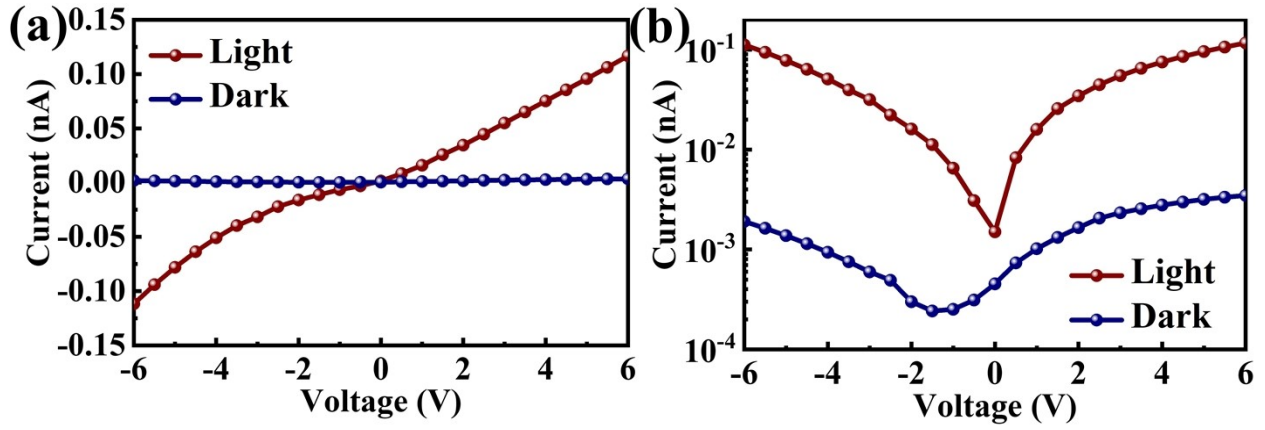

**Figure S12.** Current voltage ( $I$ - $V$ ) curves of the  $\text{Sb}_2\text{S}_3\text{-H}_2/\text{Ar}$  rod photodetector devices measured under dark and illumination with a 560 nm monochromatic light at a light intensity of  $110 \mu\text{W}/\text{cm}^2$ , respectively.

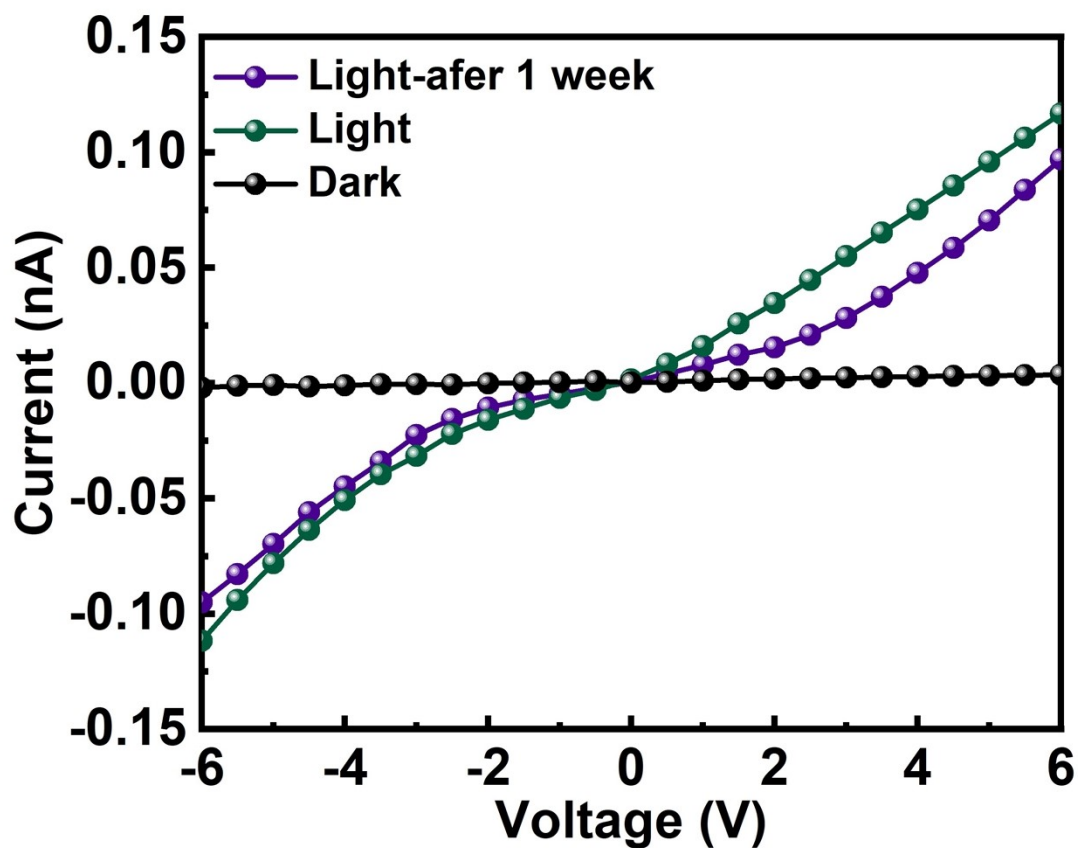

**Figure S13.** *I-V* curves of the  $\text{Sb}_2\text{S}_3\text{-H}_2/\text{Ar}$  rod photodetector device under dark and illumination of  $110 \mu\text{W}/\text{cm}^2$ , respectively. It is noted that the photocurrent of the device after storage in air for 1 week decreases slightly compared to the fresh one.
